# Supplementary material
Source: PubMed Central journal article supplement (PMC5568903)
Supplement: NIHMS863458-supplement-Supplemental.pdf [file NIHMS863458-supplement-Supplemental.pdf]

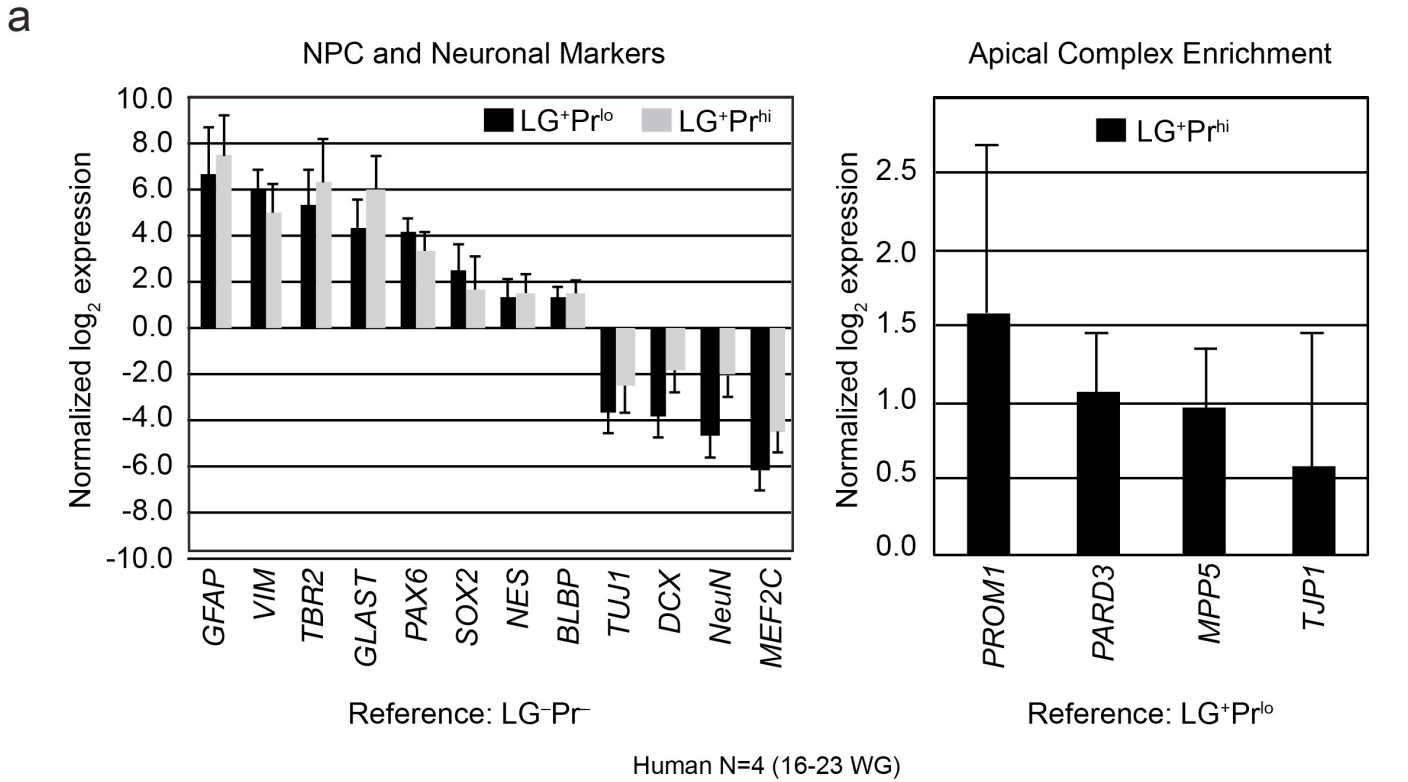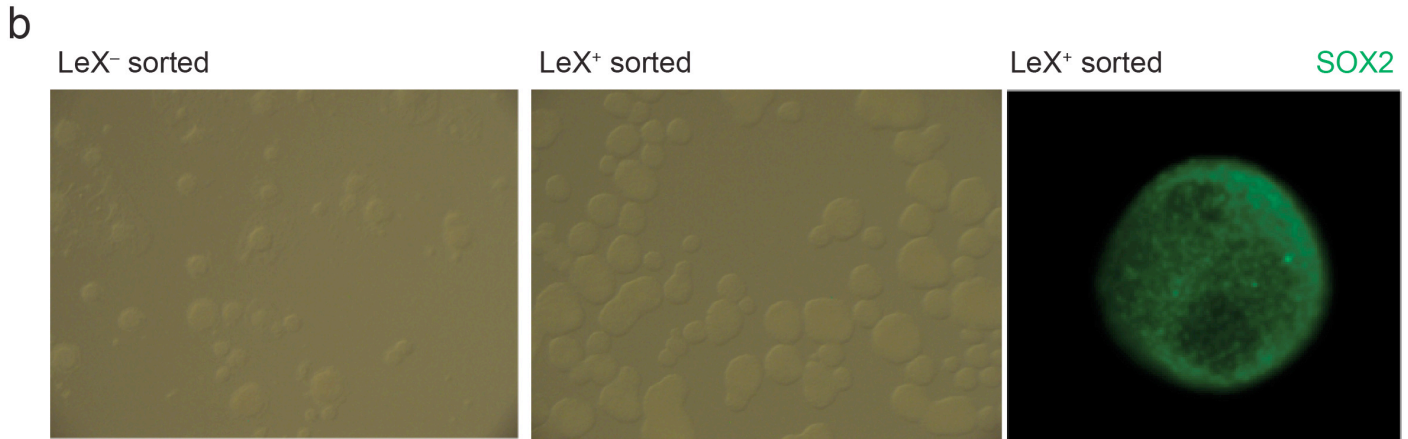

Supplementary Figure 1

**Isolation of human RGC subpopulations by FACS**

**a**, Both LG<sup>+</sup>Pr<sup>hi</sup> and LG<sup>+</sup>Pr<sup>lo</sup> subpopulations are enriched for known RGC-expressed genes (*GFAP*, *VIM*, *GLAST*, *PAX6*, *SOX2*, *BLBP*), and depleted for neuronal markers (*DCX*, *TUJ1*, *NeuN*, *MEF2C*). The LG<sup>+</sup>Pr<sup>hi</sup> subpopulation was enriched relative to the LG<sup>+</sup>Pr<sup>lo</sup> subpopulation for *PROM1* transcript as well as three other transcripts encoding apical membrane domain-specific proteins (*PARD3* [*Par3*], *TJP1* [*ZO-1*], *MPP5* [*Pals*]). Data represents four biological replicates (mean ± SEM) ranging from 16 WG to 23 WG. **b**, Primary neurospheres derived from LeX<sup>-</sup> and LeX<sup>+</sup> cells sorted from dissociated human fetal cortex. Neurospheres were serially passaged at clonal density and immunolabeled for RGC marker *SOX2*.

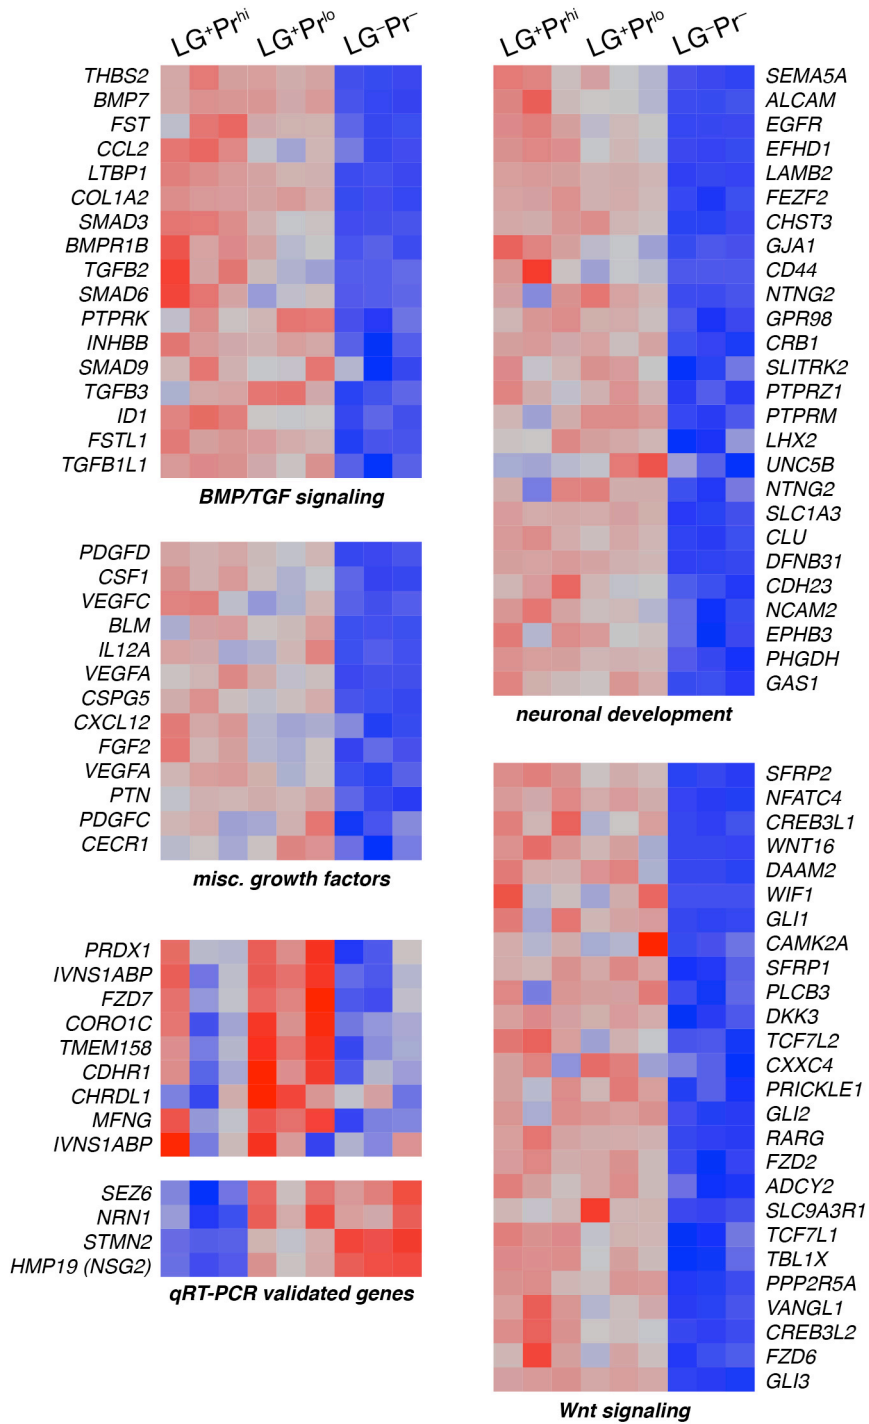

**Supplementary Figure 2**

**Gene set enrichment in human RGC subpopulations**

Gene set enrichment analysis confirmed the RGC progenitor nature of both the LG<sup>+</sup>Pr<sup>hi</sup> and LG<sup>+</sup>Pr<sup>lo</sup> subpopulations, with enrichment of important progenitor signaling pathways (e.g. Wnt/Bmp/Tgf) and gene ontology terms (cell cycle control, neural development) in both subpopulations relative to LG<sup>-</sup>Pr<sup>-</sup> neurons and other cell types.

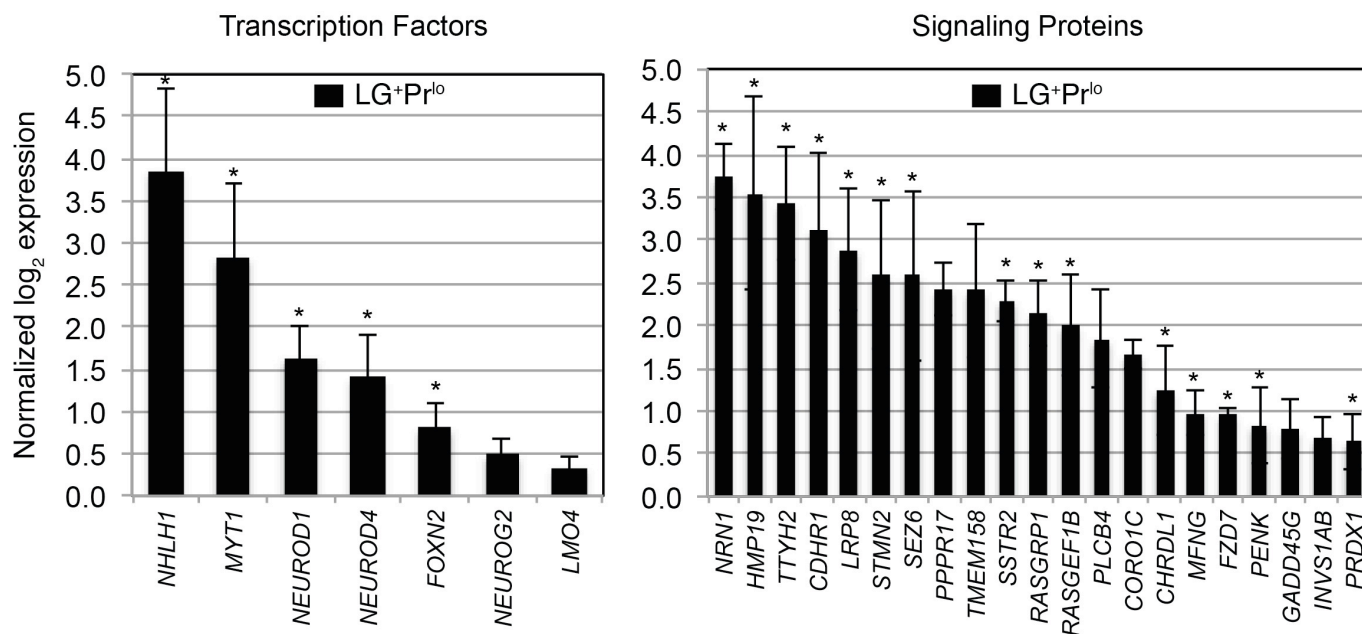

Reference: LG<sup>+</sup>Pr<sup>hi</sup>; N=6 (16 - 23 WG)

### Supplementary Figure 3

Selected LG<sup>+</sup>Pr<sup>lo</sup>-enriched candidate non-apical RGC genes validated by qRT-PCR in independent biological replicates of FACS-purified human fetal RGC.

Relative expression levels in the LG<sup>+</sup>Pr<sup>lo</sup> subpopulation compared to LG<sup>+</sup>Pr<sup>hi</sup> after normalization to housekeeping genes *ACTB* and *GAPDH*. Data represents six biological replicates (mean ± SEM) ranging from 16 WG to 23 WG (asterisk denotes p < 0.05, paired t-test; n=6, max p=0.045, all others were lower).

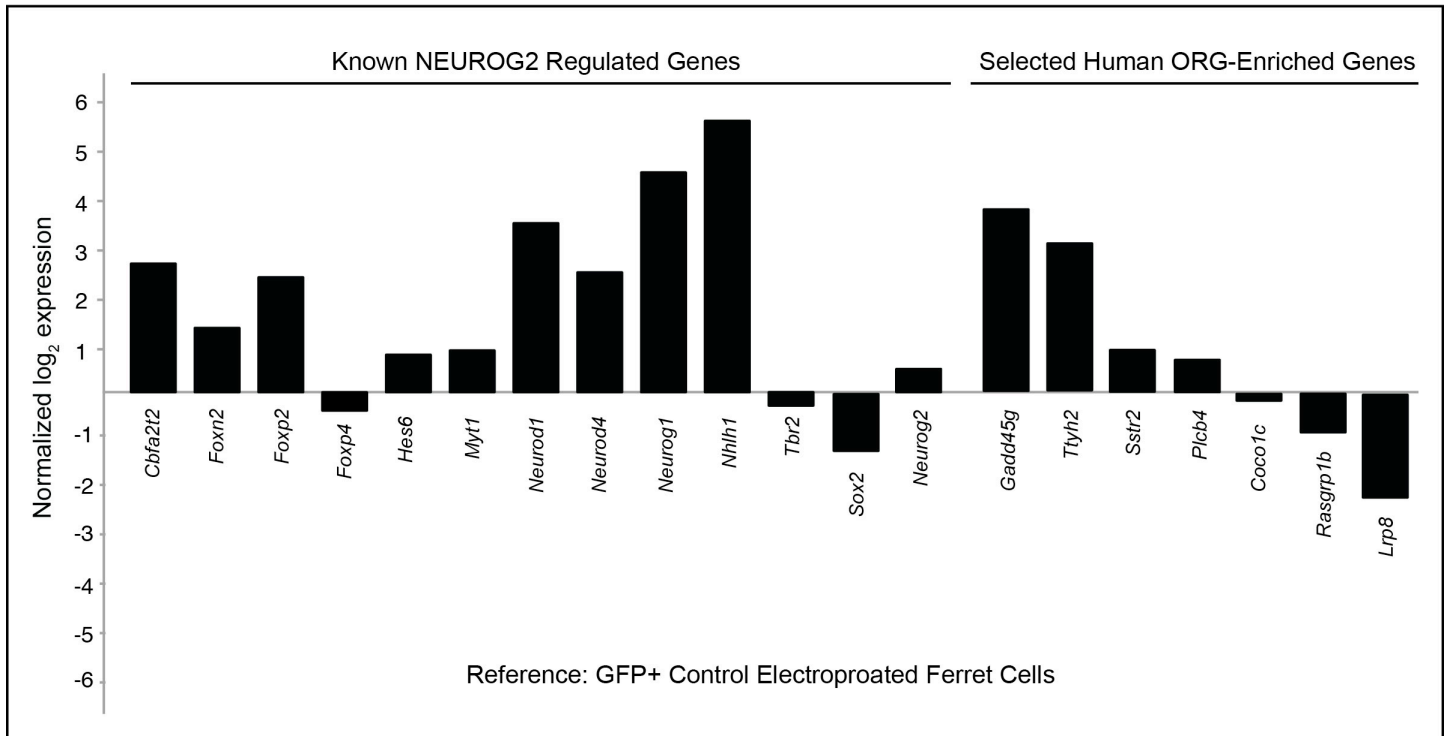

#### Supplementary Figure 4

##### Upregulation of proneural neurogenin targets in *NEUROG2*-VP16 electroporated ferret cells

*In vivo* delivery of GFP control and *NEUROG2*-VP16 constructs to ferret apical RGCs was performed by intraventricular injection and electroporation in neonatal ferret kits (n=2 per condition at postnatal day 1) as described in Figure 2. After 48 hours post-electroporation, electroporated cells were isolated for qRT-PCR analysis by enzymatic dissociation and FACS using their GFP fluorescence. Relative to GFP+ control electroporated cells, *NEUROG2*-VP16 expressing cells showed upregulation of many previously described *NEUROG2* effector genes including *Cbfa2t2*, *Foxn2*, *Foxp2*, *Hes6*, *Myt1*, *Neurod1*, *Neurod4*, *Neurog1*, and *Nhlh1*, and down-regulation of *Sox2*. In addition, we also tested expression of ferret orthologs of human ORG-enriched genes and found that several including *Gadd45g*, *Ttyh2*, *Sstr2*, and *Plcb4* were also upregulated in *NEUROG2*-VP16 cells compared to controls.

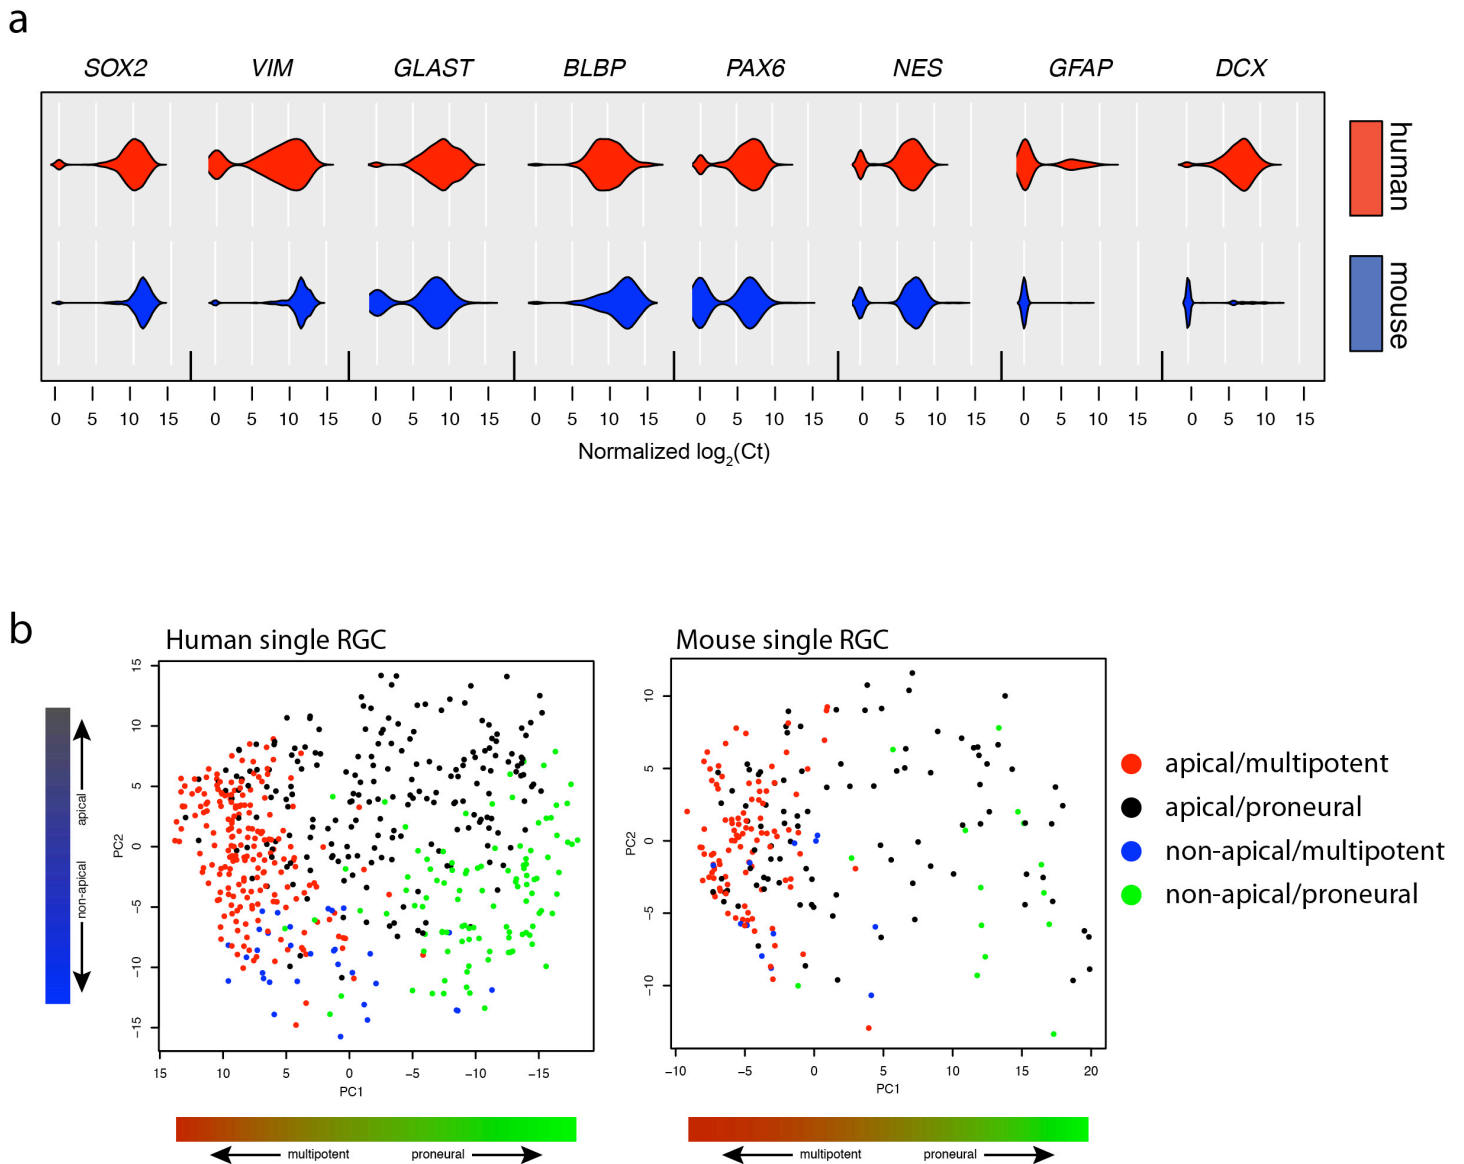

**Supplementary Figure 5**

**Single-cell expression profiles of human and mouse RGC**

**a**, Violin plots of RGC marker gene expression in human and mouse single sorted RGC reveals largely similar pattern of gene expression for RGC markers including *SOX2*, *VIM*, *GLAST*, *BLBP*, *PAX6*, *NES*. Interestingly, significant numbers of human RGC express *GFAP* and *DCX* but these genes are nearly absent in mouse RGC. **b**, Principle component analysis of 546 human (left) and 226 mouse (right) single RGC indicates distinct distributions of transcriptional states in human compared to mouse RGC. Here, “apical” is defined by expression of at least two of the four apical complex marker transcripts, and “proneural” by expression of at least two of the four Neurogenin pathway genes. In both species, the first PC (x-axis) reflects the proneural+/- dimension, with “multipotent” (presumptively pre-Neurogenin-pathway-expressing) RGC tending towards the left (red and blue cells) and proneural RGC on the right (black and green cells). Human cortex contains a greater proportion of proneural RGC, whereas mouse has fewer proneural cells which are less distinct, as indicated by the greater overlap of black and red cells in the mouse. In addition, human cortex displays far more non-apical (blue and green) cells than mouse, which again are more distinct from the apical (red and black) cells along the second PC (y-axis). In contrast, mouse non-apical RGC (blue and green) are scarce and not transcriptionally distinct from apical cells, as indicated by the lack of separation along the y-axis.

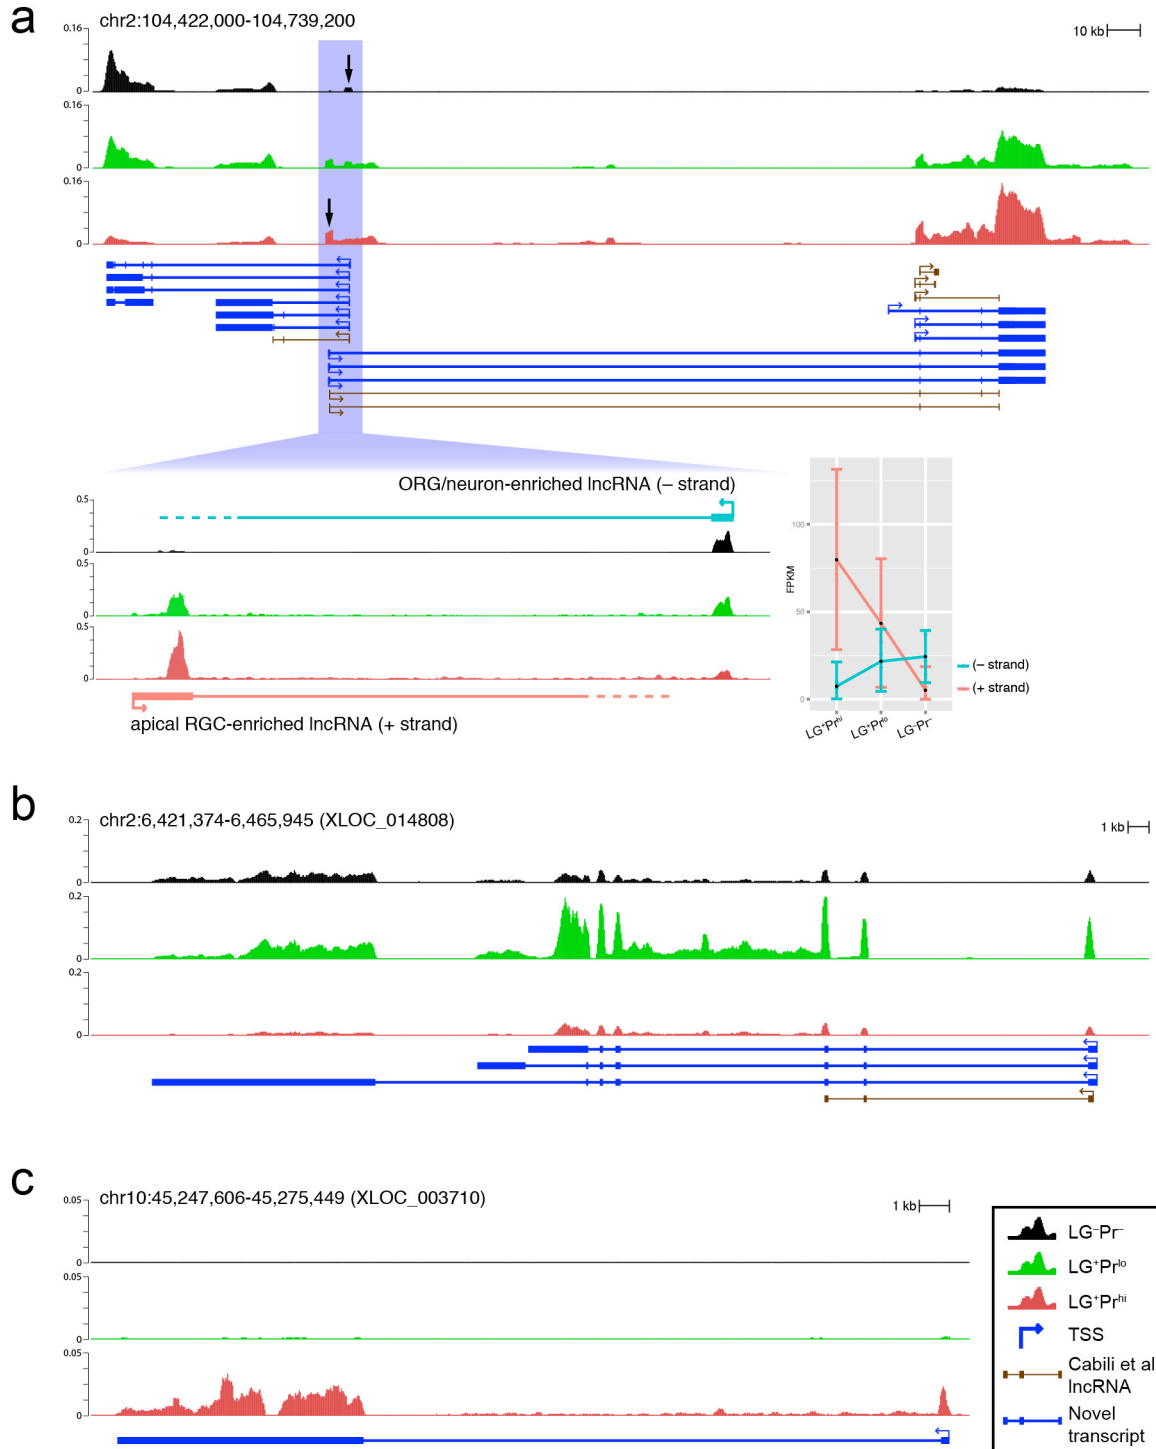

**Supplementary Figure 6**

**Differential expression of novel unannotated lncRNAs in human RGC subtypes**

RNA-seq reads displayed in genomic context for the LG<sup>+</sup>Pr<sup>hi</sup> apical RGC (red), LG<sup>+</sup>Pr<sup>lo</sup> ORG (green), and LG<sup>-</sup>Pr<sup>-</sup> cells (black). Novel transcripts assembled from the RNA-seq data are shown in blue, and previously catalogued lncRNA transcripts are shown in brown<sup>39</sup>. **a**, Two intergenic lncRNAs on chromosome 2 with distinct expression patterns in the human fetal cortex share a bidirectional promoter and overlap at their 5' ends. The plus-strand lncRNA is enriched in apical RGC, whereas the minus-strand lncRNA is relatively enriched

in ORG and neurons. Blue boxed region highlights the overlapping transcription start sites (TSS), and is enlarged below. Black arrows indicate read peaks from each strand's TSS. Bottom part of **(a)** shows the promoter at higher magnification, with expression levels of the two lncRNAs (in FPKM) plotted at right. **b**, Example of an ORG-enriched lncRNA. Multiple alternatively spliced isoforms of this multi-exon locus are expressed in all cell types assayed, but are significantly enriched in the LG<sup>+</sup>Pr<sup>lo</sup> non-apical subpopulation. A partial transcript overlapping the 5' end of the locus was previously detected by ultra-high depth RNA sequencing<sup>39</sup>; our data demonstrate that even low-abundance transcripts can be captured and fully reconstructed from an order of magnitude fewer reads when RNA is sequenced from the specific cell types that express the gene, rather than from heterogeneous bulk tissue. **c**, Example of a novel apical RGC-specific intergenic transcript not detected by previous deep-sequencing experiments.

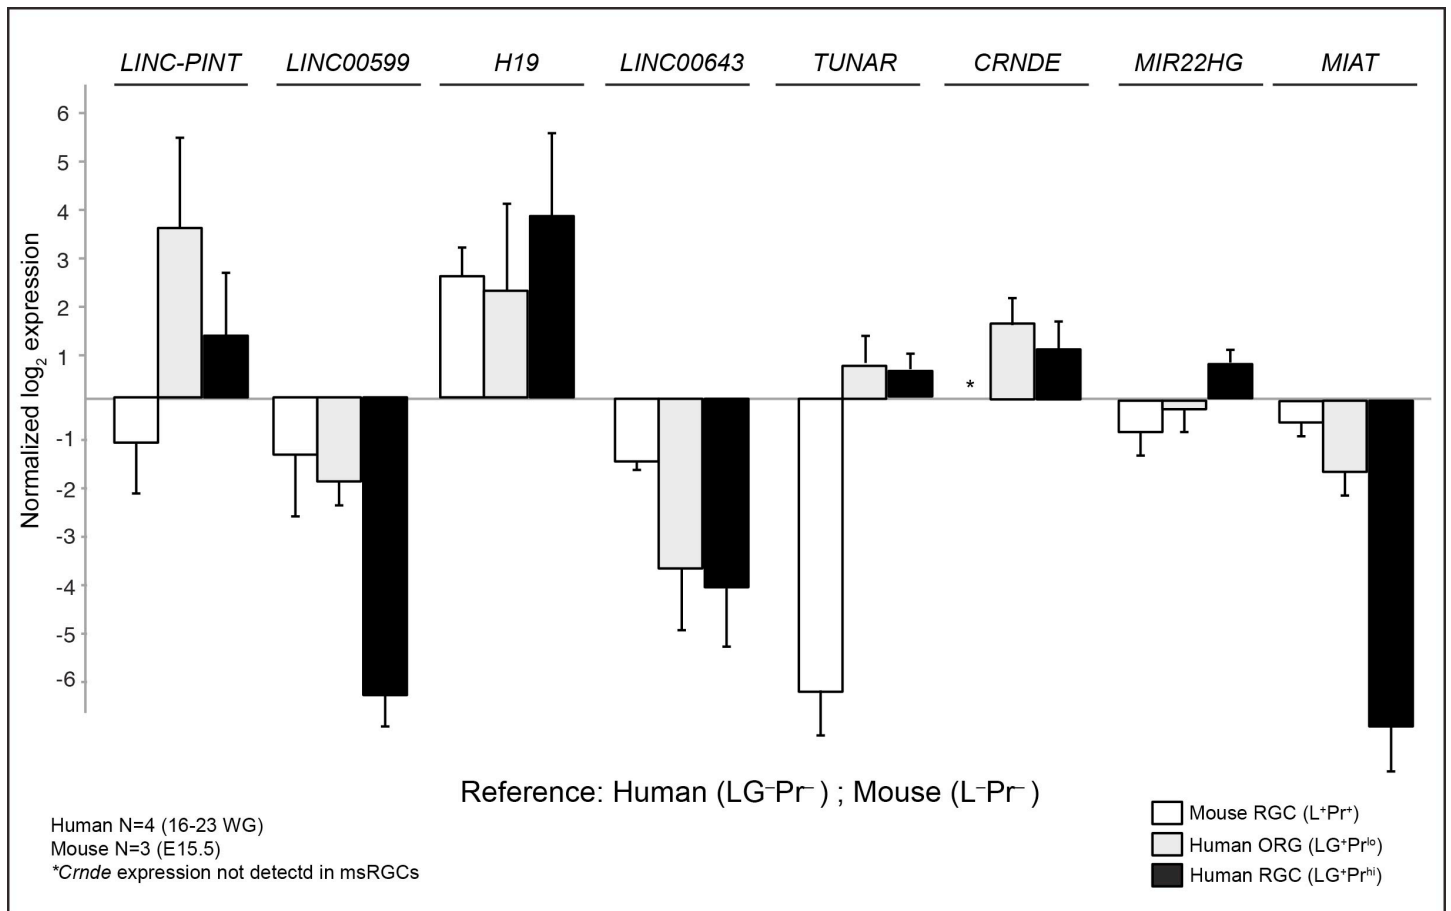

### Supplementary Figure 7

#### Differential enrichment of lncRNAs in human and mouse RGC populations

We performed qRT-PCR of several conserved lncRNAs in FACS-purified human (n=4 biological replicates ranging from 16 WG to 23 WG) and mouse RGC populations (n=3 from E15.5) comparing human ORG (LG<sup>+</sup>Pr<sup>0</sup>) and apical RGC (LG<sup>+</sup>Pr<sup>hi</sup>) with neurons (LG<sup>-</sup>Pr<sup>-</sup>) and mouse RGC (L<sup>+</sup>Pr<sup>+</sup>) with neurons (L<sup>-</sup>Pr<sup>-</sup>) (mean ± SEM). We find that several conserved lncRNAs including *LINC-PINT*, *TUNAR*, *CRNDE*, *MIR22HG* are enriched in human RGC progenitor populations but depleted in mouse RGC suggesting potentially divergent roles in human radial progenitor evolution and function.



**Supplementary Table 1 | List of human fetal specimens collected, gestational ages, and studies performed.**

| <b>Sample</b> | <b>Age (WG)</b> | <b>Studies Performed</b>                                                   |
|---------------|-----------------|----------------------------------------------------------------------------|
| <i>FB018</i>  | 23              | Candidate validation (qRT-PCR)                                             |
| <i>FB044</i>  | 16              | Candidate validation (qRT-PCR)                                             |
| <i>FB025</i>  | 23              | Candidate validation (qRT-PCR)                                             |
| <i>FB035</i>  | 18              | RNA-seq                                                                    |
| <i>FB036</i>  | 18              | Neurosphere culturing                                                      |
| <i>FB031</i>  | 19              | Candidate validation (qRT-PCR)                                             |
| <i>FB032</i>  | 18              | RNA-seq                                                                    |
| <i>FB033</i>  | 19              | RNA-seq                                                                    |
| <i>FB040</i>  | 20              | Candidate validation (qRT-PCR), Single-cell expression profiling (Biomark) |
| <i>FB043</i>  | 17              | Candidate validation (qRT-PCR), Single-cell expression profiling (Biomark) |
| <i>FB024</i>  | 20              | Single-cell expression profiling (Biomark)                                 |
| <i>FB049</i>  | 16              | Single-cell expression profiling (Biomark)                                 |
| <i>FB053</i>  | 21              | Single-cell expression profiling (Biomark)                                 |
| <i>FB066</i>  | 18              | Single-cell expression profiling (Biomark)                                 |
| <i>FB068</i>  | 20              | Single-cell expression profiling (Biomark)                                 |

**Supplementary Table 2 | Comparison of the present RNA-seq data to previous transcriptome studies of fetal cortical progenitors.**

**Genes expressed in human but not mouse RGC  
(Lui, Nowakowski et al., 2014)**

| Gene Symbol    | Human Progenitor Expression Pattern (FACS-RNA-seq) | Ferret RGC Expression Level (fpkm) |
|----------------|----------------------------------------------------|------------------------------------|
| <i>ABHD3</i>   | pan-RGC enriched                                   | 0.8                                |
| <i>ASAP3</i>   | pan-RGC enriched                                   | 14.4                               |
| <i>BMP7</i>    | pan-RGC enriched                                   | 25.7                               |
| <i>C5</i>      | pan-RGC enriched                                   | 0.2                                |
| <i>C8orf4</i>  | pan-RGC enriched                                   | 22.9                               |
| <i>FAM107A</i> | pan-RGC enriched                                   | 1.9                                |
| <i>FOXN4</i>   | pan-RGC enriched                                   | 9.7                                |
| <i>ITGA2</i>   | apical RGC > ORG                                   | 30.2                               |
| <i>LRIG3</i>   | pan-RGC enriched                                   | 7.1                                |
| <i>LRRC17</i>  | pan-RGC enriched                                   | 0.4                                |
| <i>PAM</i>     | pan-RGC enriched                                   | 22.9                               |
| <i>PDGFD</i>   | pan-RGC enriched                                   | 0.1                                |
| <i>PDGFRB</i>  | apical RGC > ORG                                   | 14.9                               |
| <i>PDLIM3</i>  | pan-RGC enriched                                   | 17.7                               |
| <i>RFTN2</i>   | pan-RGC enriched                                   | 43.0                               |
| <i>SLC2A10</i> | pan-RGC enriched                                   | 3.1                                |
| <i>SP110</i>   | pan-RGC enriched                                   | 0.3                                |
| <i>STOX1</i>   | pan-RGC enriched                                   | 20.8                               |
| <i>ZC3HAV1</i> | pan-RGC enriched                                   | 2.8                                |

*n.a., not annotated*

**Human OSVZ-enriched genes  
(Miller, Ding et al., 2014)**

| Gene Symbol    | Human Progenitor Expression Pattern (FACS-RNA-seq) | Ferret RGC Expression Level (fpkm) |
|----------------|----------------------------------------------------|------------------------------------|
| <i>LRP3</i>    | neuron-enriched                                    | 34.7                               |
| <i>HNRNPA3</i> | no significant difference                          | n.a.                               |
| <i>HNRNPH3</i> | no significant difference                          | 151.3                              |
| <i>MT1F</i>    | no significant difference                          | n.a.                               |
| <i>MT1G</i>    | no significant difference                          | n.a.                               |
| <i>MT1H</i>    | no significant difference                          | n.a.                               |
| <i>POLR2J2</i> | no significant difference                          | n.a.                               |
| <i>PSMC3IP</i> | no significant difference                          | 30.7                               |

*n.a., not annotated*

**Human OSVZ-enriched genes  
(Fietz et al., 2012)**

| Gene Symbol     | Human Progenitor Expression Pattern (FACS-RNA-seq) | Ferret RGC Expression Level (fpkm) |
|-----------------|----------------------------------------------------|------------------------------------|
| <i>Ankrd23</i>  | no significant difference                          | n.a.                               |
| <i>C1orf111</i> | neuron-enriched                                    | 0.5                                |

|                  |                            |       |
|------------------|----------------------------|-------|
| <i>Cerkl</i>     | pan-RGC enriched           | 0.6   |
| <i>Cldn11</i>    | apical RGC > ORG           | 1.1   |
| <i>Dcbld1</i>    | no significant difference  | 0.0   |
| <i>Dclk3</i>     | strong_late_ON             | 0.1   |
| <i>Fkbp11</i>    | no significant difference  | 8.4   |
| <i>Gigyf2</i>    | no significant difference  | 18.7  |
| <i>Itih4</i>     | no significant difference  | 0.0   |
| <i>KIAA1324</i>  | neuron-enriched            | 16.1  |
| <i>KIAA1324L</i> | neuron-enriched            | n.a.  |
| <i>Lims2</i>     | apical RGC > ORG           | 0.7   |
| <i>Nipsnap1</i>  | no significant difference  | 42.6  |
| <i>Olig1</i>     | apical RGC > ORG > neurons | n.a.  |
| <i>Parp10</i>    | no significant difference  | n.a.  |
| <i>Pcbp2</i>     | no significant difference  | 541.3 |
| <i>Prss12</i>    | strong_late_ON             | 11.7  |
| <i>Sox10</i>     | apical RGC > ORG           | 1.0   |
| <i>Tmem88</i>    | neuron-enriched            | n.a.  |
| <i>TPGS2</i>     | no significant difference  | 20.1  |

*n.a., not annotated*

### Embryonic mouse cortex single-cell profiling "cluster II/III genes" (Kawaguchi et al., 2008)

| Gene Symbol            | Human Progenitor Expression Pattern (FACS-RNA-seq) | Ferret RGC Expression Level (fpkm) |
|------------------------|----------------------------------------------------|------------------------------------|
| <i>Afap1</i>           | no significant difference                          | 19.3                               |
| <i>CLVS1</i>           | no significant difference                          | 1.3                                |
| <b><i>Coro1c</i></b>   | ORG-enriched                                       | 46.9                               |
| <i>Cxcl12</i>          | apical RGC-enriched                                | 0.3                                |
| <i>Elav2</i>           | no significant difference                          | n.a.                               |
| <i>Elav4</i>           | no significant difference                          | n.a.                               |
| <i>Eomes (Tbr2)</i>    | pan-RGC enriched                                   | 173.5                              |
| <b><i>Gadd45G</i></b>  | ORG & neurons > apical RGC                         | 52.8                               |
| <i>Hes6</i>            | pan-RGC enriched                                   | n.a.                               |
| <b><i>Insm1</i></b>    | ORG-enriched                                       | 12.6                               |
| <i>Lrp8</i>            | ORG & neurons > apical RGC                         | 42.8                               |
| <i>Lrrn3</i>           | no significant difference                          | 60.8                               |
| <i>Mfng</i>            | pan-RGC enriched                                   | 41.5                               |
| <i>Mgat5b</i>          | neuron-enriched                                    | 0.8                                |
| <b><i>Myt1</i></b>     | ORG & neurons > apical RGC                         | 14.0                               |
| <b><i>Neurod1</i></b>  | ORG & neurons > apical RGC                         | 22.1                               |
| <i>Neurog2</i>         | no significant difference                          | 155.0                              |
| <b><i>Nrn1</i></b>     | ORG & neurons > apical RGC                         | 19.4                               |
| <b><i>Rasgef1b</i></b> | ORG & neurons > apical RGC                         | 8.2                                |
| <i>Rwdd3</i>           | no significant difference                          | 5.2                                |
| <i>Sdc3</i>            | no significant difference                          | 61.4                               |
| <i>Serping1</i>        | no significant difference                          | 2.9                                |
| <i>Sertad4</i>         | pan-RGC enriched                                   | 6.4                                |
| <i>Slc17a6</i>         | ORG & neurons > apical RGC                         | 2.0                                |
| <i>Sorbs2</i>          | ORG & neurons > apical RGC                         | 59.9                               |
| <b><i>Sstr2</i></b>    | ORG-enriched                                       | n.a.                               |
| <i>Trp53inp1</i>       | no significant difference                          | n.a.                               |

*n.a., not annotated*

## Supplementary Table 2 | Comparison of the present RNA-seq data to previous transcriptome studies of fetal cortical progenitors.

Several recent studies have examined the transcriptional signature of human fetal germinal zones using manually or laser capture-assisted microdissection techniques<sup>13-15</sup>. Here we list the central findings of several of these papers and the differential expression patterns we observe for these genes using our FACS-RNA-seq strategy (middle column). We also report the expression levels (fpkm) of these genes in ferret RGC (right column), noting that many genes are conserved in their progenitor expression but some, such as *PDGFD*, are not. Most notable in this analysis is the absence of ORG-enriched genes from previous transcriptome assays of the human OSVZ<sup>13,14</sup>, where most ORG are located. We attribute this discrepancy to the highly heterogeneous cellular composition of the OSVZ, which in addition to ORG harbors multipolar intermediate progenitors, radially migrating postmitotic neurons generated in both the VZ and SVZ, and tangentially migrating interneurons originated from the ganglionic eminences. Furthermore, our single-cell data demonstrate additional transcriptional heterogeneity even within ORG, which further confounds efforts to profile these cells from bulk tissue samples. Thus none of the ORG-enriched genes identified in our current study have previously been associated with this cell type by other methods. Remarkably, however, at least 8 genes that we found as having significant or trending human ORG enrichment were previously described in a single-cell expression microarray analysis of the embryonic mouse cortex<sup>46</sup> (genes marked in red bold text in the bottom section). These authors also showed by *in situ* hybridization in E14 mouse cortex that several human ORG-enriched genes are expressed in a narrow band of cells at the VZ-SVZ border in mouse, in contrast to the OSVZ location of most ORG in human and other ORG-abundant species. We interpret these results as indicating that some human ORG-enriched genes

are also expressed in mouse progenitors during the transition from VZ RGC to SVZ IP, as has been clearly demonstrated for *Neurog2*<sup>23</sup>, thus further supporting our conclusion that the ORG transcriptional signature reflects a transitional developmental state.

**Supplementary Table 3: Species used for multi-species alignment**

| Common name                    | Latin binomial                        |
|--------------------------------|---------------------------------------|
| <b>Primate subset</b>          |                                       |
| Baboon                         | <i>Papio hamadryas</i>                |
| Bushbaby                       | <i>Otolemur garnettii</i>             |
| Chimp                          | <i>Pan troglodytes</i>                |
| Crab-eating macaque            | <i>Macaca fascicularis</i>            |
| Gibbon                         | <i>Nomascus leucogenys</i>            |
| Gorilla                        | <i>Gorilla gorilla gorilla</i>        |
| Green monkey                   | <i>Chlorocebus sabaeus</i>            |
| Human                          | <i>Homo sapiens</i>                   |
| Marmoset                       | <i>Callithrix jacchus</i>             |
| Orangutan                      | <i>Pongo pygmaeus abelii</i>          |
| Rhesus                         | <i>Macaca mulatta</i>                 |
| Squirrel monkey                | <i>Saimiri boliviensis</i>            |
| <b>Euarchontoglires subset</b> |                                       |
| Brush-tailed rat               | <i>Octodon degus</i>                  |
| Chinchilla                     | <i>Chinchilla lanigera</i>            |
| Chinese hamster                | <i>Cricetus griseus</i>               |
| Chinese tree shrew             | <i>Tupaia chinensis</i>               |
| Golden hamster                 | <i>Mesocricetus auratus</i>           |
| Guinea pig                     | <i>Cavia porcellus</i>                |
| Lesser Egyptian jerboa         | <i>Jaculus jaculus</i>                |
| Mouse                          | <i>Mus musculus</i>                   |
| Naked mole-rat                 | <i>Heterocephalus glaber</i>          |
| Pika                           | <i>Ochotona princeps</i>              |
| Prairie vole                   | <i>Microtus ochrogaster</i>           |
| Rabbit                         | <i>Oryctolagus cuniculus</i>          |
| Rat                            | <i>Rattus norvegicus</i>              |
| Squirrel                       | <i>Spermophilus tridecemlineatus</i>  |
| <b>Laurasiatheria subset</b>   |                                       |
| Alpaca                         | <i>Vicugna pacos</i>                  |
| Bactrian camel                 | <i>Camelus ferus</i>                  |
| Big brown bat                  | <i>Eptesicus fuscus</i>               |
| Black flying-fox               | <i>Pteropus alecto</i>                |
| Cat                            | <i>Felis catus</i>                    |
| Cow                            | <i>Bos taurus</i>                     |
| David's myotis bat             | <i>Myotis davidii</i>                 |
| Dog                            | <i>Canis lupus familiaris</i>         |
| Dolphin                        | <i>Tursiops truncatus</i>             |
| Domestic goat                  | <i>Capra hircus</i>                   |
| Ferret                         | <i>Mustela putorius furo</i>          |
| Hedgehog                       | <i>Erinaceus europaeus</i>            |
| Horse                          | <i>Equus caballus</i>                 |
| Killer whale                   | <i>Orcinus orca</i>                   |
| Megabat                        | <i>Pteropus vampyrus</i>              |
| Microbat                       | <i>Myotis lucifugus</i>               |
| Pacific walrus                 | <i>Odobenus rosmarus divergens</i>    |
| Panda                          | <i>Ailuropoda melanoleuca</i>         |
| Pig                            | <i>Sus scrofa</i>                     |
| Sheep                          | <i>Ovis aries</i>                     |
| Shrew                          | <i>Sorex araneus</i>                  |
| Star-nosed mole                | <i>Condylura cristata</i>             |
| Tibetan antelope               | <i>Pantholops hodgsonii</i>           |
| Weddell seal                   | <i>Leptonychotes weddellii</i>        |
| White rhinoceros               | <i>Ceratotherium simum</i>            |
| <b>Afrotheria subset</b>       |                                       |
| Aardvark                       | <i>Orycteropus afer afer</i>          |
| Cape elephant shrew            | <i>Elephantulus edwardii</i>          |
| Cape golden mole               | <i>Chrysochloris asiatica</i>         |
| Elephant                       | <i>Loxodonta africana</i>             |
| Manatee                        | <i>Trichechus manatus latirostris</i> |
| Tenrec                         | <i>Echinops telfairi</i>              |
| <b>Mammal subset</b>           |                                       |
| Armadillo                      | <i>Dasypus novemcinctus</i>           |
